# Supplementary material for: 1, 25-dihydroxy-vitamin D3 with tumor necrosis factor-alpha protects against rheumatoid arthritis by promoting p53 acetylation-mediated apoptosis via Sirt1 in synoviocytes
Source: PubMed Central journal article supplement (PMC5133971; doi:10.1038/cddis.2016.300), 2016-10-20

**Figure S2**

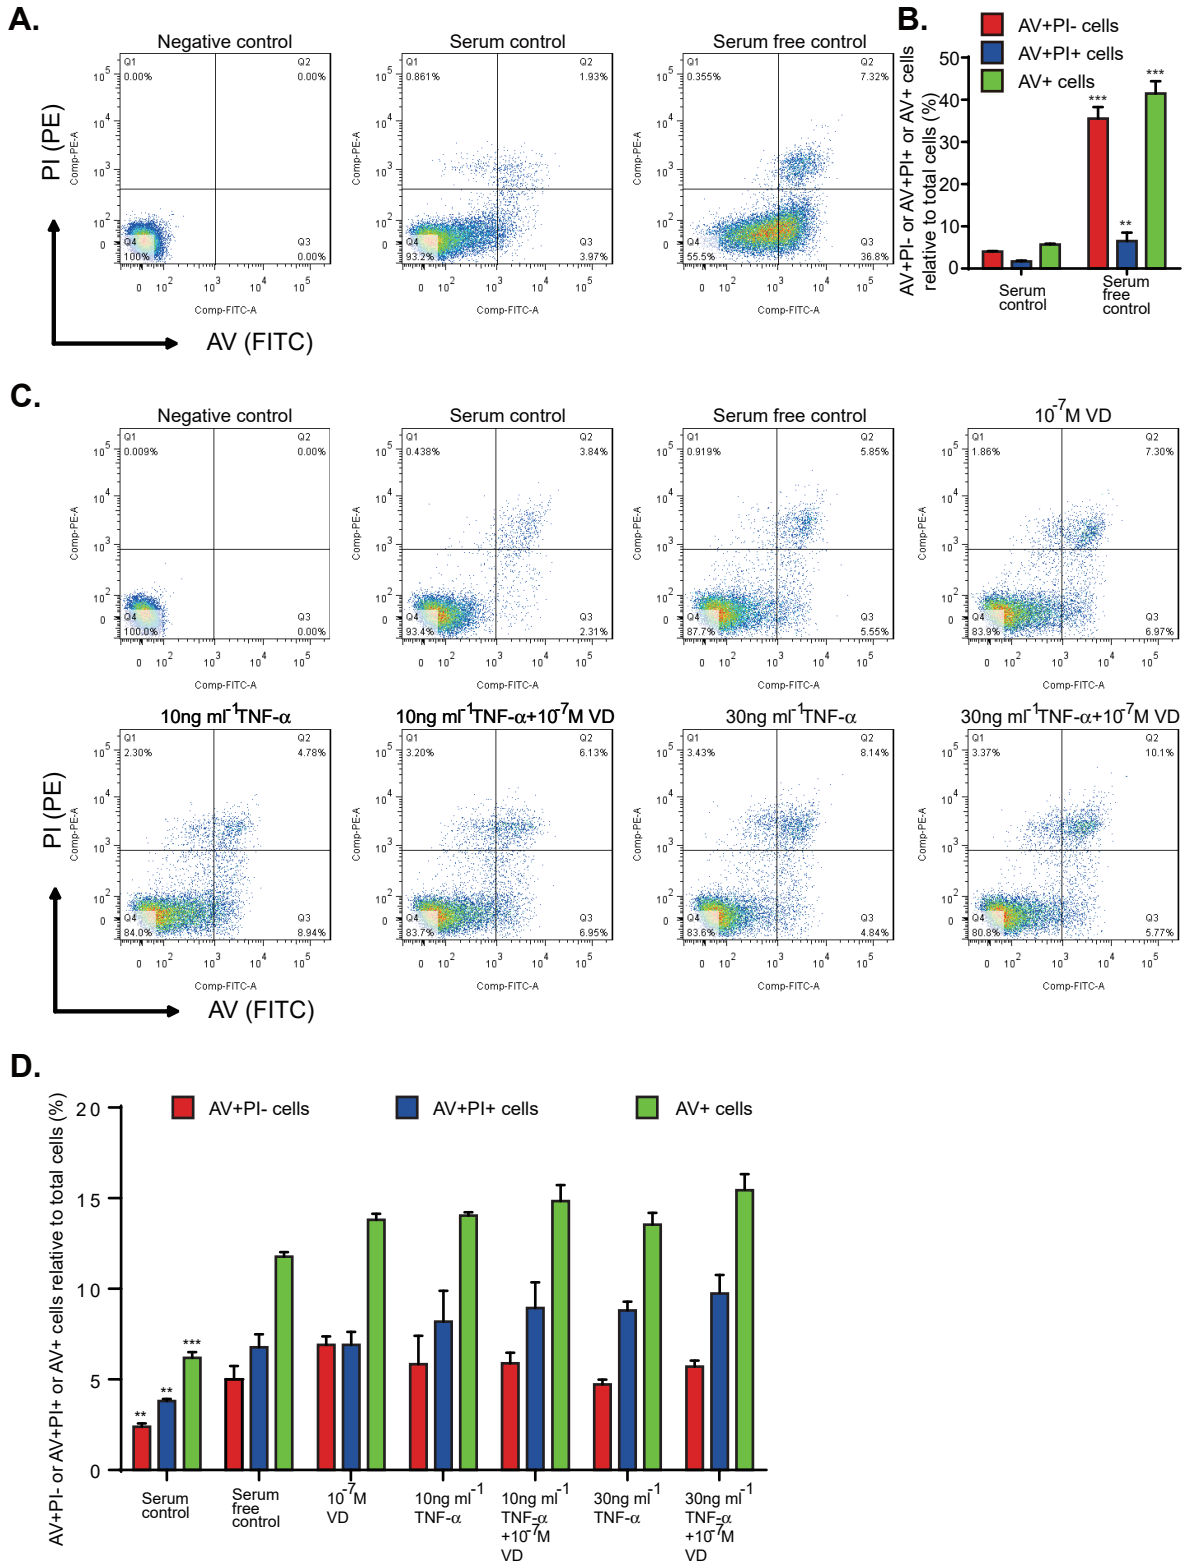

Supplement: cddis2016300x2.pdf [file cddis2016300x2.pdf]
